1                   **Spectro-temporal neural dynamics during sentence completion**

2

3

4 Tim Coolen<sup>a, b,\*</sup>, Alexandru Mihai Dumitrescu<sup>a,\*</sup>, Vincent Wens<sup>a,c</sup>, Mathieu  
5 Bourguignon<sup>a,d,e</sup>, Gustavo Lucena Gómez<sup>a</sup>, Antonin Rovai<sup>a</sup>, Niloufar Sadeghi<sup>b</sup>, Charline  
6 Urbain<sup>a,f</sup>, Serge Goldman<sup>a,c</sup>, Xavier De Tiège<sup>a,c</sup>

7

8

9 <sup>a</sup>Laboratoire de Cartographie fonctionnelle du Cerveau, ULB Neuroscience Institute  
10 (UNI), Université libre de Bruxelles (ULB), Brussels, Belgium.

11 <sup>b</sup>Department of Radiology, CUB - Hôpital Erasme, Université libre de Bruxelles (ULB),  
12 Brussels, Belgium.

13 <sup>c</sup>Magnetoencephalography unit, Clinics of Functional Neuroimaging, Service of Nuclear  
14 Medicine, CUB - Hôpital Erasme, Université libre de Bruxelles (ULB), Brussels, Belgium.

15 <sup>d</sup>BCBL – Basque Center on Cognition, Brain and Language, 20009 San Sebastian, Spain.

16 <sup>e</sup>Laboratory of Neurophysiology and Movement Biomechanics, ULB Neuroscience  
17 Institute (UNI), Université libre de Bruxelles (ULB), Brussels, Belgium.

18 <sup>f</sup>UR2NF, Neuropsychology and Functional Neuroimaging Research Unit, Centre for  
19 Research in Cognition and Neurosciences (CRCN), ULB Neuroscience Institute (UNI),  
20 Université Libre de Bruxelles(ULB), Brussels, Belgium.

21 \* Equal contribution.

22

23

24 Corresponding author: Tim Coolen, Department of Radiology, CUB - Hôpital Erasme,  
25 Université libre de Bruxelles (ULB), 808 route de Lennik, Brussels, Belgium. E-mail:  
26 tim.coolen@ulb.be Tel: +32.2.555.47.11.

27 **Abstract**

28

29 This magnetoencephalography (MEG) study aimed at characterizing the spectro-  
30 temporal dynamics of brain oscillatory activity elicited by sentence completion (SC). For  
31 that purpose, we adapted a version of the SC experimental paradigm typically used in  
32 functional magnetic resonance imaging to MEG investigation constraints. Twenty right-  
33 handed healthy young adults underwent MEG recordings while they were sequentially  
34 presented with short sentences divided in three parts: the first two giving context and the  
35 last requiring completion. MEG data were then analysed using a prior-free, non-  
36 parametric statistical approach with stringent control of the family-wise error rate. We  
37 identified three successive significant neural response patterns associated with distinct  
38 spatial and spectro-temporal characteristics: (i) an early (<300 ms) bioccipital 4-10-Hz  
39 event-related synchronization (ERS); (ii) an intermediate (at about 400 ms) 8-30-Hz  
40 event-related desynchronization (ERD) in an extended semantic network involving the  
41 ventral language stream as well as bilateral posterior nodes of the default mode network  
42 (DMN) in both hemispheres; (iii) a late (>800 ms) 8-30 Hz ERD involving the left dorsal  
43 language stream. Furthermore, the left component of the ventral language stream  
44 displayed prolonged ERD after 800 ms compared to the right which showed signs of  
45 inhibition in the form of ERS. Overall, this study elucidates the dynamics of the recruitment  
46 of the language network that accompany SC and the spectro-temporal signature of an  
47 extended semantic network. This MEG adaptation of an SC paradigm also paves the way  
48 for novel approaches in presurgical language mapping and may help to understand the  
49 neural underpinnings of the alterations of sentence completion in various neurologic  
50 disorders affecting language.

51

52

53 **Keywords:** Sentence completion, Semantic Network, Ventral Stream,  
54 Magnetoencephalography, Oscillations

## 55 1. Introduction

56

57 Sentence completion (SC) is a well-documented language task in the functional  
58 magnetic resonance imaging (fMRI) literature (e.g., Ashtari et al., 2005; Barnett et al.,  
59 2014; Black et al., 2017; Kircher et al., 2001; Petrella et al., 2006; Salek et al., 2017;  
60 Wilson et al., 2017; Zaca et al., 2012; Zacà et al., 2013). It is endorsed by the American  
61 Society of Functional Neuroradiology as a first-choice experimental paradigm for  
62 language functional brain mapping (Black et al., 2017) that is typically constructed as a  
63 block design (for a description of fMRI designs, see, e.g, Amaro & Barker, 2006). In such  
64 design, the active condition usually consists of short written sentences with a missing final  
65 part that participants are asked to complete, while the control condition includes low-level  
66 visual stimuli such as gibberish written sentences with a missing final part. Likely due to  
67 the high linguistic complexity, inherent to sentence-level processing (Vigneau et al.,  
68 2006), SC robustly (Black et al., 2017; Zacà et al., 2013) and reliably elicits increases in  
69 blood oxygen level dependent (BOLD) signal in the left perisylvian regions (Wilson et al.,  
70 2017) deemed essential to language function (for a review, see, e.g., Tremblay & Dick,  
71 2016).

72 Owing to its exquisite temporal resolution, magnetoencephalography (MEG) provides  
73 the opportunity to investigate the spectral and temporal oscillatory neural dynamics  
74 underlying sentence processing within left-lateralized language-related regions. Previous  
75 MEG studies (e.g., Halgren et al., 2002; Hultén et al., 2019; Kielar et al., 2015; Lam et al.,  
76 2016; Meltzer et al., 2017; Meltzer & Braun, 2011; Piai et al., 2015; Wang et al., 2018)  
77 did not investigate the neural oscillatory dynamics that accompany the completion of  
78 sentences during SC. Instead, they focused on the semantic integration of incoming  
79 words in the sentence context (Halgren et al., 2002; Hultén et al., 2019; Lam et al., 2016;  
80 Wang et al., 2018). Other studies investigated the effect of the modulation of the  
81 phonological and semantic aspects of the sentence (Meltzer et al., 2017) or of specific  
82 linguistic abnormalities such as semantic violations (Kielar et al., 2015). Moreover, the  
83 sentence endings were given in those studies, or cued by a picture in one of them (Piai  
84 et al., 2015) which focused on production aspects.

85 This MEG study was therefore performed to characterize the spectral, temporal and  
86 spatial dynamics of the neural events associated with the whole SC process. For that  
87 purpose, we developed a version of the classic fMRI SC experimental paradigm adapted  
88 to the constraints of MEG investigations (for a detailed description, see, e.g., Gross et al.,  
89 2013). We first analyzed the whole-brain MEG data acquired in right-handed healthy  
90 young adults using a prior-free, non-parametric statistical approach with stringent control  
91 of the family-wise error rate. Secondly, we restricted the investigation to the bilateral  
92 ventral stream of language (Hickok & Poeppel, 2007) to shed light on the relative  
93 contribution of its left and right components to sentence processing. Indeed, in addition  
94 to the typically left-sided changes elicited by sentence stimuli in left-sided language-  
95 related areas (Tzourio-Mazoyer et al., 2017), both fMRI (e.g., Barnett et al., 2014; Wilson  
96 et al., 2017; Zaca et al., 2012) and MEG (e.g., Halgren et al., 2002; Hultén et al., 2019;  
97 Kielar et al., 2015; Lam et al., 2016; Meltzer et al., 2017) studies also reported  
98 contralateral homologous right-sided activity modulations, notably in right posterior  
99 temporal regions (e.g., Kircher et al., 2001; Meltzer et al., 2017). Still, the functional role  
100 of these right-sided temporal changes during sentence processing remains poorly  
101 understood. They may correspond to context processing (Vigneau et al., 2010) or  
102 prolonged maintenance of multiple semantic representations necessary to understand  
103 the gist of the sentence (Kircher et al., 2001). We expected that, due its exquisite temporal  
104 resolution, MEG will yield novel insights into the different functional roles of left and right  
105 components of the ventral language stream through potentially divergent spectro-  
106 temporal fingerprints.

## 107 **2. Materials and methods**

108

### 109 2.1. Subjects

110 Twenty right-handed healthy adult subjects (mean age:  $31.2 \pm 8.1$  years, range:  
111 22.0 – 51.4 years; 11 females) were included in this study. None of them had a prior  
112 history of neurologic, psychiatric or learning disorder, nor MRI contraindication. All  
113 subjects were right-handed ( $93.3 \pm 8.8$  %; range: 77.8 – 100 %) according to the  
114 Edinburgh Handedness Inventory scale (Oldfield, 1971).

115 All subjects contributed to the study after giving written informed consent. They  
116 were given a small financial incentive for their participation. The study received prior  
117 approval by the Ethics Committee of the CUB – Hôpital Erasme (Université libre de  
118 Bruxelles, Brussels, Belgium; REF: P2017/272)

119

### 120 2.2. SC paradigm

121 A total of 72 simple short sentences in French were created (listed in  
122 Supplementary Table 1). Each sentence was divided into three parts. The first part (P1)  
123 contained the subject, composed of a common noun and its determiner (mean of  $2.04 \pm$   
124  $0.31$  words;  $10.47 \pm 2.59$  characters, including spaces; e.g., “The hen”). The predicate  
125 was partly stated in the second part (P2;  $2.53 \pm 0.73$  words;  $12.36 \pm 3.29$  characters; e.g.,  
126 “lays an”) and had to be completed by the participants in the third part (P3), which  
127 prompted the completion by a visual clue (“\_\_\_\_\_”).

128 A schematic representation of the paradigm is provided in figure 1. A block  
129 structure, typical for a clinical fMRI SC paradigm, served as the canvas for this MEG  
130 adaptation and consisted of six “*task*” blocks of 60 s each, alternating with “*rest*” periods  
131 of 30 s. Total paradigm duration was 9.6 min. The task blocks of interest contained six  
132 sentences. A fixation cross lasting 1 s preceded every sentence, and each part thereof  
133 (i.e., P1, P2, P3) was shown for 3 s. The thirty-six sentences were different and randomly  
134 picked among the available sentence database for each participant. Rest periods  
135 consisted of three sequences that were created to visually resemble the target sentences  
136 and also divided in a first and a second part, composed only of “\*” characters and spaces,

137 followed by the same empty third part (“\_\_\_\_\_.”). For added clarity, a 1 s cue  
138 followed by a 2 s fixation cross announced the beginning of each block.

139         Subjects were instructed to silently read the first two parts of the sentences and to  
140 silently generate the sentence endings with one or few words when presented with the  
141 P3 completion cue. During the rest periods, they were asked to simply look at the screen.  
142 Prior to the MEG recording, participants were trained on a separate set of six sentences  
143 and asked to overtly read and complete the sentences to ensure they correctly  
144 understood the instructions. All subjects understood the task and performed the training  
145 correctly.

146         Visual stimuli appeared in white Times New Roman font on a black background.  
147 They were projected onto a screen placed at the feet of the MEG bed and made visible  
148 to the subject through an oblique mirror so that the visual angle did not exceed 7°. The  
149 appearance of each sentence part (P1, P2 and P3) was marked by a specific trigger  
150 signal recorded in a separate channel synchronously to the MEG data.

**A) Paradigm block structure (6 repetitions)**

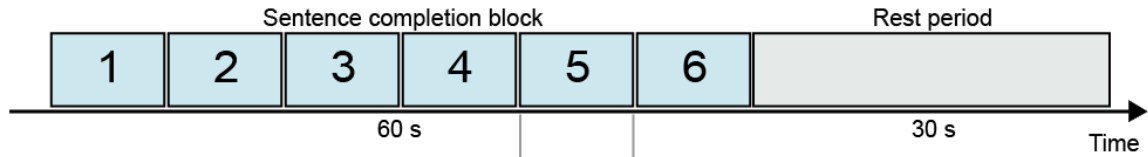

**B) Sentence structure**

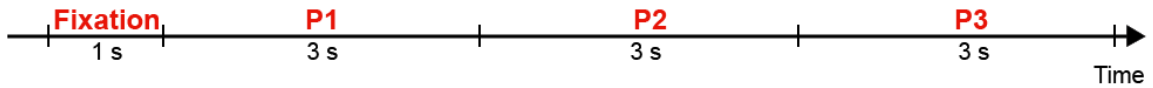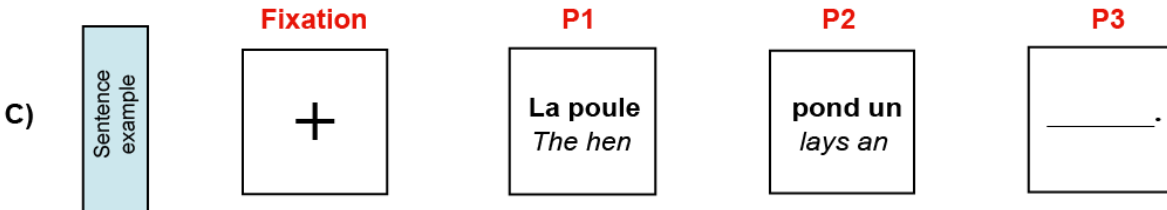

151

152

153 **Figure 1: Schematic representation of the SC paradigm. A)** The general block

154 structure consisted of task blocks of six sentences (blue), alternating with rest periods

155 (grey). **B)** The sentence structure was composed of a fixation cross followed by a first

156 (P1: determiner and noun), second (P2: part of predicate) and third (P3: to complete) part.

157 **C)** Example sentence. The text in French actually presented to the subjects is written in

158 bold. For convenience, the English translation is also provided here in italic.

### 159 2.3. Data acquisition

160 MEG data were recorded (band-pass: 0.1–330 Hz; sampling rate: 1 kHz) in a  
161 lightweight magnetically shielded room (Maxshield™, MEGIN, Croton Healthcare,  
162 Helsinki, Finland; see De Tiège et al., 2008 for more details) using a 306-channel whole-  
163 scalp-covering neuromagnetometer (Triux™, MEGIN, Croton Healthcare, Helsinki,  
164 Finland). Subjects were installed in the supine position to minimize head movement  
165 artifacts.

166 Four fronto-mastoid head-tracking coils monitored the subjects' head position  
167 inside the MEG helmet. The locations of the coils and at least 350 head-surface points  
168 (on scalp, nose and face) with respect to anatomical fiducials were recorded with an  
169 electromagnetic tracker (Fastrak, Polhemus, Colchester, VT, USA) before starting the  
170 MEG session.

171 For MEG source localization, an anatomical 3D T1-weighted gradient echo  
172 sequence (time of repetition = 8.2 ms, time of echo = 3.1 ms, flip angle = 12°, field of view  
173 = 24 cm, matrix = 240 x 240, isotropic 1 mm<sup>3</sup> voxels) of the head was also acquired for  
174 each subject using a hybrid 3T SIGNA™ PET-MR scanner (GE Healthcare, Milwaukee,  
175 Wisconsin, USA) with a 24-channel head and neck coil.

176

### 177 2.4. MEG data preprocessing

178 Raw MEG data were preprocessed off-line using signal space separation (Taulu  
179 et al., 2005) to reduce external interferences and correct for head movements  
180 (MaxFilter™ v2.2 with default parameters, MEGIN, Croton Healthcare, Helsinki, Finland).  
181 Cardiac, eye-movement and electronic artifacts were then identified by independent  
182 component analysis (FastICA algorithm with rank reduction to 30 and nonlinearity *tanh*;  
183 Hyvärinen & Oja, 2000; RRID: SCR\_013110) applied to sensor time series filtered  
184 between 0.5 and 45 Hz (Vigario et al., 2000) and visual inspection of the components  
185 (mean number of artifactual components per subject : 2.30 ± 0.57). Artifactual  
186 components were then regressed out from the full-rank data.

187 The preprocessed MEG data were further handled with Fieldtrip (Oostenveld et al.,  
188 2011; RRID:SCR\_004849). The continuous data were first segmented in 6 s-long epochs  
189 covering each sentence part P1, P2 or P3 (2000 ms prestimulus to 4000 ms post-



190 stimulus, each stimulus time being identified by a trigger event). Epochs with absolute  
191 signal values exceeding 3 pT in at least one magnetometer or 0.7 pT/cm in at least one  
192 gradiometer were discarded as likely contaminated by artifacts.

193 The time-frequency Fourier coefficients were then estimated using a 7-cycle Morlet  
194 wavelet decomposition, for each of the 306 MEG channels (102 magnetometers and 204  
195 planar gradiometers). This was done in a window of interest starting at 500 ms before  
196 and ending at 3000 ms after each sentence part (P1, P2, P3) with a 50 ms time increment.  
197 Of note, the usage of wider (6 s-long) epochs was necessary to probe the lowest  
198 frequencies in this window of interest. The Fourier coefficients were estimated from 1 Hz  
199 to 45 Hz by steps of 1 Hz.

200

## 201 2.5. Source reconstruction

202 Individual anatomical MRIs were segmented using the Freesurfer software (Fischl,  
203 2012; Martinos Center for Biomedical Imaging, Massachusetts, USA; RRID:  
204 SCR\_001847). MEG and MRI coordinate systems were co-registered using the three  
205 anatomical fiducial points for initial estimation and the head-surface points to manually  
206 refine the surface co-registration.

207 Individual MEG forward models were then computed using the single-layer  
208 Boundary Element Method implemented in the MNE-C software suite (Gramfort et al.,  
209 2014; Martinos Center for Biomedical Imaging, Massachusetts, USA; RRID:  
210 SCR\_005972). To ease the group-level analysis, forward models were based on a source  
211 grid obtained from a common 5-mm cubic grid (containing 16102 source locations), built  
212 in the Montreal Neurological Institute (MNI) template brain by applying the non-linear  
213 spatial deformation estimated with the algorithm implemented in Statistical Parametric  
214 Mapping (SPM12, Wellcome Department of Cognitive Neurology, London, UK; RRID:  
215 SCR\_007037). Three orthogonal current dipoles were placed at each grid point.

216 The resulting forward models were then inverted via Minimum Norm Estimation  
217 (MNE; Dale & Sereno, 1993). The sensor-space noise covariance was estimated from 5  
218 minutes of artifact-free data recorded from an empty room preprocessed using signal  
219 space separation and filtered between 0.5 and 45 Hz. The regularization parameter was  
220 derived for each condition (P1, P2 and P3) from the signal-to-noise level estimated from

221 the noise covariance and the covariance of the concatenated epoch data (Wens et al.,  
222 2015). The depth bias was corrected by noise standardization (Pascual-Marqui, 2002).  
223 The MNE inverse operator was then used to project the sensor-level time-frequency  
224 Fourier coefficients at each epoch and obtain the time-frequency Fourier coefficients of  
225 each dipole component of the 16102 sources. The amplitude of each source was finally  
226 obtained as the Euclidean norm of the magnitude of the three corresponding fourier  
227 coefficients and averaged over epochs. This led to one source distribution of time-  
228 frequency power map per condition (P1, P2 and P3) and subject, which was then used  
229 for subsequent analysis.

230

## 231 2.6. Event-related (de)synchronization measures

232 A baseline was defined as the period of time preceding the onset of the first part  
233 of the sentence (P1), from 500 ms to 100 ms prestimulus, i.e., during the display of the  
234 fixation cross. Event-related “*enhancement*” or “*synchronization*” (ERS) was defined as  
235 post-stimulus power increase in a given frequency band compared to the baseline  
236 (Pfurtscheller, 2001). Conversely, event-related “*suppression*” or “*desynchronization*”  
237 (ERD) was defined as a power decrease (Pfurtscheller, 2001). This baseline was chosen  
238 to measure neural processes unfolding as the sentence progressed, including sustained  
239 language-related activity, in distinction, e.g., with Hultén et al. (2019) who focused on the  
240 effect of the previous context on upcoming stimuli.

241 In practice, source-level ERS/ERD measures were obtained for each frequency  
242 bin by dividing its value with the mean baseline value at the same frequency and  
243 subtracting 1.

244

## 245 2.7. Statistical analyses

246 Group-level statistical analysis of the trial-averaged data was performed with a  
247 maximum *t* statistic procedure (Blair & Karniski, 1993), which provides a rigorous control  
248 of the family-wise error (FWE) rate in the context of multidimensional MEG data (16102  
249 sources x 45 frequency bins x 60 time points), fraught with correlations among  
250 neighbouring measurements, while limiting the loss of statistical power (Groppe et al.,  
251 2011). For each sentence part (P1, P2 and P3), we started by computing a one-sample *t*

252 statistic for each source-time-frequency point of our dataset. This corresponds to a mass-  
253 univariate test against the null hypothesis that conditions induce no power changes  
254 compared to the baseline, i.e., no ERS or ERD. The maximum absolute  $t$  value across  
255 this dataset defined the maximum statistic. Its null distribution was generated non-  
256 parametrically by recomputing 2000 times a similar statistic after changing the sign of the  
257 relative amplitude change data in a random selection of subjects. This amounts to the  
258 fact that ERS and ERD are exchangeable under the null. The 95th percentile of this null  
259 distribution of maximum was used to establish a significance threshold at a 95%  
260 confidence level, fully corrected. All supra-threshold values were deemed significant.

261

## 262 2.8. Global spectro-temporal neural dynamics of SC

263 In order to obtain an overview of the spectro-temporal neural dynamics of the three  
264 constituent parts of the SC paradigm, a global time-frequency analysis map was  
265 constructed as the mean  $t$ -value across all sources. Then, only the supra-threshold  $t$ -  
266 values were included to locate the time-frequency points disclosing significant ERS  
267 (positive values) or ERD (negative values).

268

## 269 2.9. Frequency band and time-resolved mapping associated with SC

270 The source location associated with supra-threshold power modulations were  
271 projected onto a standard MNI brain and visualized with Mricron (Rorden & Brett, 2000;  
272 RRID:SCR\_002403) to create a frequency and time-resolved functional mapping. This  
273 source-space analysis was based on the single statistical threshold obtained from the  
274 unique analysis considering all time (60) and frequency (45) points for each of the three  
275 sentence parts. Given that a large number of such maps may be built (60 time points x  
276 45 frequency bins), we considered several averages within sliding frequency bands and  
277 time windows, allowing for the exploration of ERS/ERD dynamics on different spectro-  
278 temporal scales. We first investigated spectrally-resolved maps averaged over the whole  
279 post-stimulus period (0–3000 ms) and over classical frequency bands (theta: 4-7 Hz;  
280 alpha: 8-11 Hz; low-beta: 12-20 Hz; high-beta: 21-30 Hz; low-gamma: 31-45 Hz). Their  
281 temporal development was assessed by averaging over the whole frequency spectrum  
282 (1-45 Hz) within five consecutive, post-stimulus, non-overlapping 400 ms-long windows,

283 followed by a last longer window of 1000 ms. This rather coarse temporal segmentation  
284 was chosen based on the global time-frequency graph (see Results).

285 A detailed list of statistically significant local maxima was created for the band-  
286 limited maps for further analyses. These local maxima were identified on the thresholded  
287 maps further smoothed with an isotropic gaussian kernel (full width at half maximum = 8  
288 mm). Local maxima were discarded if they did not fall within the cortical parcels of the  
289 Automated Anatomical Labelling atlas (AAL; Tzourio-Mazoyer et al., 2002; RRID:  
290 SCR\_003550) and the cerebellar hemispheres to capture plausible cortical activity.

291 Additionally, to quantify the hemispheric dominance of each frequency band and  
292 time window, a laterality index (LI) was extracted from the corresponding maps as the  
293 relative difference between the number  $L$  of supra-threshold sources in the left  
294 hemisphere and the number  $R$  of supra-threshold sources in the right hemisphere, i.e.,  
295  $LI = (L - R)/(L + R)$ . A positive LI thus indicates a leftward dominance, with the  
296 maximum value  $LI = 1$  reached if significant sources occur only in the left hemisphere.  
297 Likewise, negative LI indicates rightward dominance and the minimum  $LI = -1$  is reached  
298 if significant effects arise in the right hemisphere only. A separate LI was calculated for  
299 ERS and ERD.

300

## 301 2.10 Spectro-temporal neural dynamics in the right vs. left ventral language stream during 302 SC

303 A region of interest (ROI) covering the ventral language stream was constructed  
304 on the basis of a meta-analytic language map (association test map;  $p < .01$  corrected for  
305 false discovery rate; 1101 studies included; methodological details available on  
306 <http://neurosynth.org>) obtained with the Neurosynth online tool (Yarkoni et al., 2011;  
307 RRID:SCR\_006798). The map was smoothed with an isotropic Gaussian kernel (full width  
308 at half maximum = 10 mm) to account for the difference in location between fMRI  
309 activations and MEG sources, which is of the order of the centimetre (e.g., Stippich et al.,  
310 2007). A subset of the smoothed and binarized ( $z$ -score  $> 0$ ) left-sided map belonging to  
311 the posterior middle/inferior temporal (Hickok & Poeppel, 2007) and fusiform (Saur et al.,  
312 2008) AAL parcellations (Tzourio-Mazoyer et al., 2002; RRID: SCR\_003550) with MNI  $y$   
313 coordinates between -32 mm (posterior edge of Heschl's gyrus parcellation) and -76 mm

314 (posterior edge of middle temporal gyrus) was defined as the left part of the ventral  
315 stream. Its mirror image constituted the right-sided counterpart. The two ROIs are  
316 represented in Figure 5 (rightmost column).

317 Time-frequency values spatially-averaged within ROI were used to probe neural  
318 oscillatory modulations potentially hidden by the stringent statistical threshold imposed by  
319 the whole-brain analysis (i.e., loss of sensitivity due to the use of maximum statistics and  
320 the large amount of comparisons), and to perform pairwise comparisons of the right vs.  
321 left ROIs.

322 Statistical testing of this difference was based on a maximum statistics procedure  
323 similar to the whole-brain analysis but spatially restricted to the ROI. Here, univariate  $t$ -  
324 statistics corresponded to two-sample paired  $t$ -tests and the null distribution was derived  
325 by randomly permuting the labels 'left' and 'right' among subjects before computing these  
326  $t$ -values and extracting their maximum across time, frequencies, and sources in the ROI  
327 (number of permutations: 2000).

328

### 329 2.11. Data availability statement

330 The MEG data used in this study will be made available upon reasonable request  
331 to the corresponding author and after acceptance by institutional authorities (CUB Hôpital  
332 Erasme and Université libre de Bruxelles).

### 333 **3. Results**

334

#### 335 3.1. Global spectro-temporal neural dynamics of SC

336         The general pattern of the spectro-temporal neural dynamics of SC was visualized  
337 using whole-brain-averaged time-frequency maps of ERS/ERD (Figure 2). It consisted of  
338 an immediate post-stimulus ERS in the lower frequency range (mainly < 10 Hz) at the  
339 onset of each sentence part, though only the initial ERS in P1 in the theta/alpha range (5-  
340 8 Hz) reached significance for a short period of time (0-300 ms). This ERS was followed  
341 by an ERD peaking around 400 ms mainly in the alpha and beta frequency bands.  
342 Significant ERD took place from 250 ms to 600 ms in P1, between 350 ms and the rest  
343 of the post-stimulus period in P2 and essentially between 300 ms and 1800 ms in P3. The  
344 frequency range of significant ERD was more limited in P1 (alpha and high beta bands)  
345 while it stretched from theta to low gamma bands in P2 and P3.

346         Given the temporal spread of the significant ERD in P2 and P3, five non-  
347 overlapping 400 ms time windows were selected to cover the first 2 s of the post-stimulus  
348 period, followed by a final longer 1000 ms window to study the last second that was only  
349 relevant in P2.

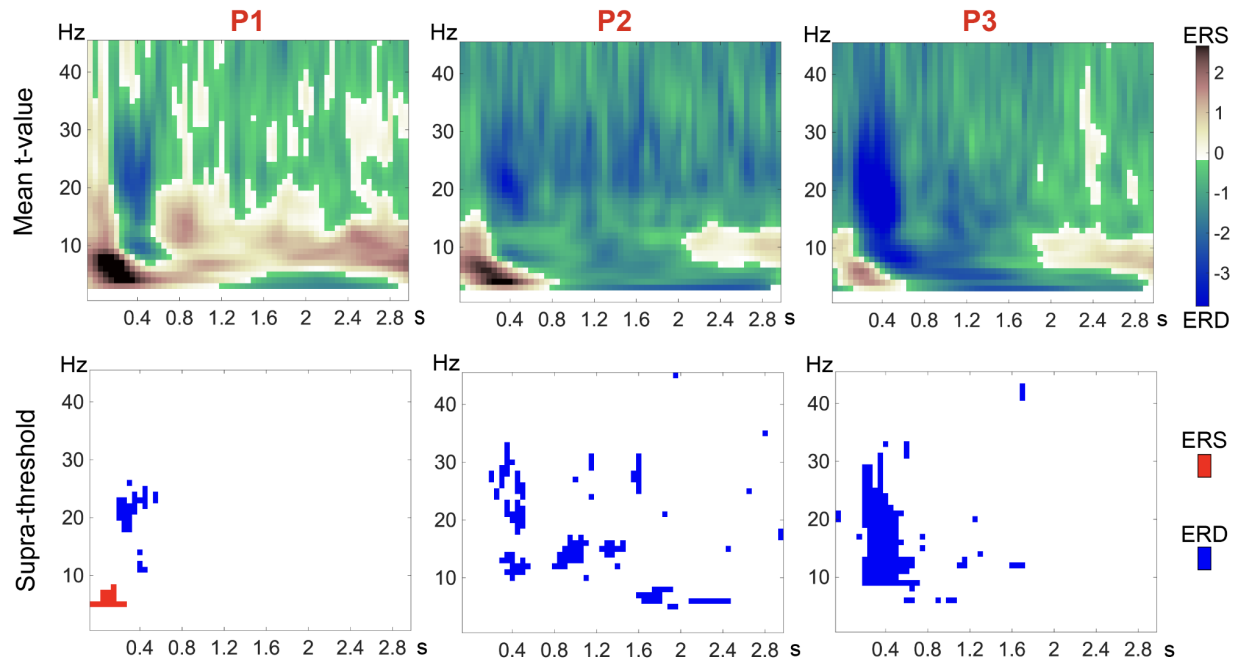

350

351

352 **Figure 2: Time-frequency maps for the three parts of the SC paradigm.** Whole-  
353 brain (average across all sources) power modulations associated with the first (P1,  
354 noun and determiner; **Left**), second (P2, part of predicate; **Middle**) and third part (P3, to  
355 be completed; **Right**) of the sentence. **Top.** Average of *t*-values of the statmax  
356 procedure without statistical masking, with a pink to dark red scale grading for positive  
357 (ERS) values and green to dark blue scale grading for negative (ERD) values. **Bottom.**  
358 Time-frequency bins of significant ( $p < .05$  FWE corrected) ERS (red) or ERD (blue).

359 3.2. Frequency band and time-resolved mapping associated with SC

360 For each sentence part, brain maps locating significant ERS and ERD in classic  
361 frequency bands (theta: 4-7 Hz; alpha: 8-11 Hz; low-beta: 12-20 Hz; high-beta: 21-30 Hz;  
362 low-gamma: 31-45 Hz) at any post-stimulus time are represented on Figure 3 along with  
363 the corresponding LI measuring the left-right hemispheric asymmetry of significant ERS  
364 or ERD. Their temporal development (in five consecutive 400 ms-long windows, followed  
365 by a last longer window of 1000 ms) are shown on Figure 4. Associated local maxima are  
366 listed in Supplementary Tables 2 and 3.



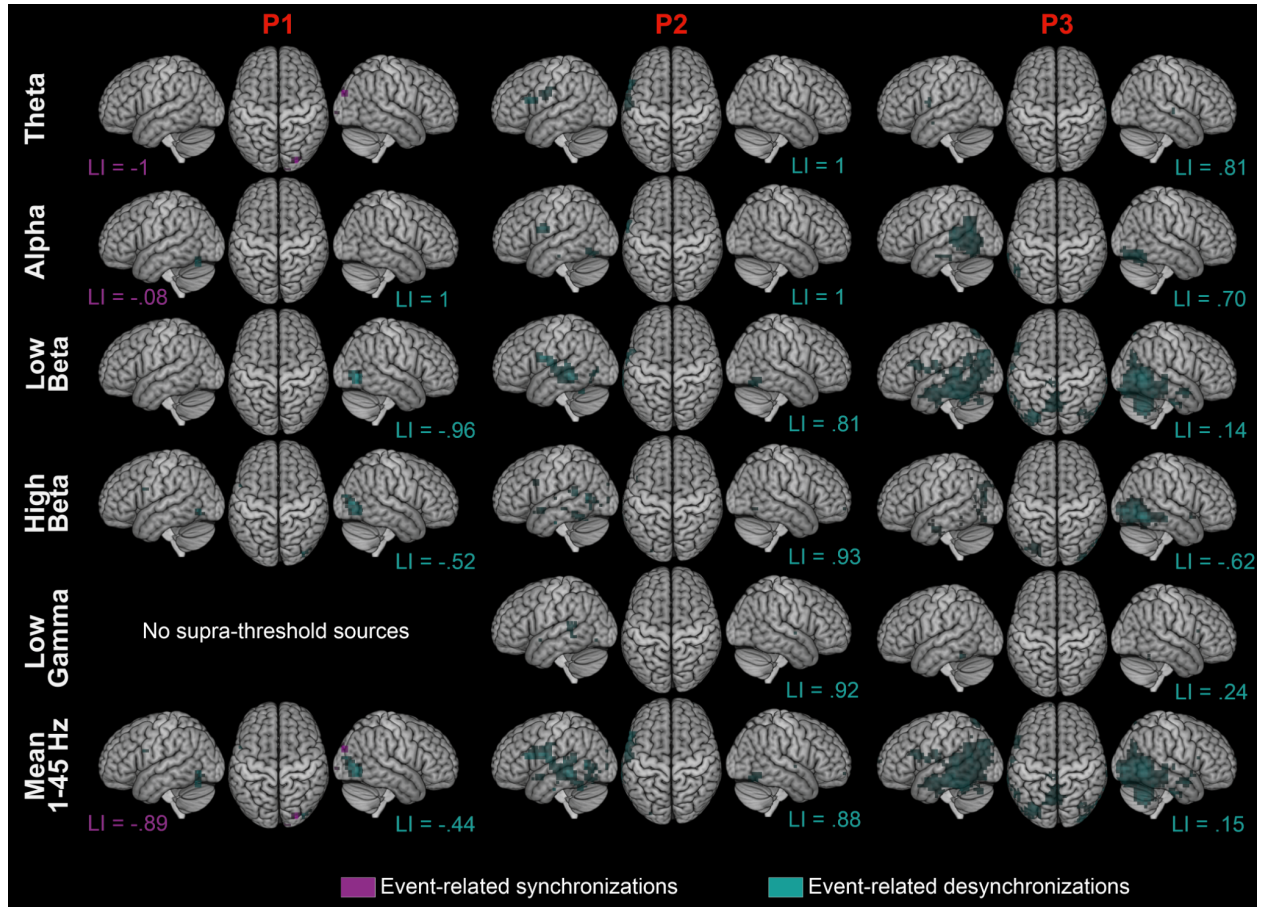

367

368

369 **Figure 3: Brain maps showing frequency-dependent changes in neural activity**  
370 **during the three parts of SC.** Group-level maps of significant ( $p < .05$  FWE corrected)  
371 ERS (magenta) and ERD (cyan) averaged across the whole post-stimulus period are  
372 superimposed on surface projections (left lateral, top, right lateral) of the standard MNI  
373 brain. The supratentorial lateralization indices (LI) derived by counting significant ERS  
374 voxels (magenta font) and significant ERD voxels (cyan font) are also indicated (bottom  
375 of left and right projections). The first (**P1**, noun and determiner; **Left**), second (**P2**, part  
376 of predicate; **Middle**) and third (**P3**, to be completed; **Right**) parts are depicted in the  
377 corresponding three columns. Rows correspond to frequency bands in which significant  
378 ERS/ERD values were further averaged: theta (4-7 Hz), alpha (8-11 Hz), low beta (12-  
379 20 Hz), high beta (21-30 Hz), low gamma (30-45 Hz) and broadband average across  
380 the whole frequency range (1-45 Hz).

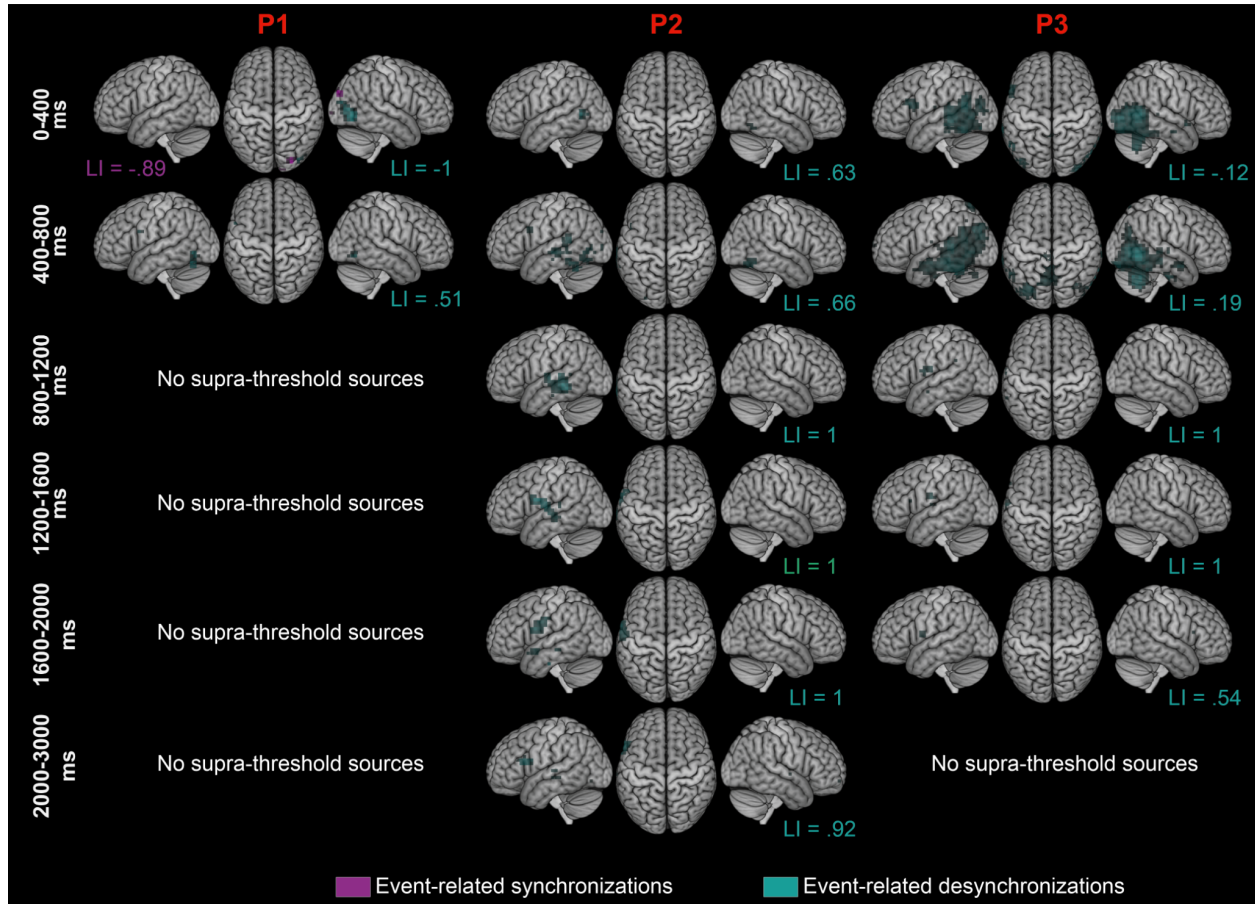

381

382

383 **Figure 4: Brain maps showing time-dependent changes in neural activity during**  
384 **the three parts of SC.** Group-level significant ( $p < .05$  FWE corrected) ERS (magenta)  
385 and ERD (cyan) averaged across the whole frequency range (1-45 Hz) superimposed  
386 on surface projections (left lateral, top, right lateral) of the standard MNI brain. The  
387 supratentorial lateralization indices (LI) derived by counting significant ERS voxels  
388 (magenta font) and significant ERD voxels (cyan font) are indicated (bottom of left and  
389 right projections). The first (**P1**: noun and determiner; **Left**), second (**P2**, part of  
390 predicate; **Middle**) and third (**P3**, to be completed; **Right**) parts are depicted in the  
391 corresponding three columns. The rows correspond to the temporal averages of  
392 ERS/ERD within consecutive 400 ms-long windows except for the last row (over the last  
393 second of the post-stimulus period).

394           During the first part of the SC paradigm (P1; Figs. 3 and 4, left column), the first  
395 theta and alpha ERS occurring in the 0-400 ms time window were located in bilateral  
396 calcarine cortices (not visible on source projections but detailed in Supplementary Table  
397 1-2) as well as in the right lateral occipital cortex, leading to a right-dominant LI. The low-  
398 beta part of the ERD occurring in the same time window appeared in right lateral occipito-  
399 temporal and posterior fusiform regions, also leading to a right-dominant LI. Postero-  
400 inferior ERD became more bilateral and supported by high beta in the 400-800 ms time-  
401 window, which also disclosed a small cluster of high-beta ERD in the left inferior frontal  
402 gyrus (IFG), leading to a left-dominant LI. No ERS/ERD was significant after 800 ms.

403           During the second part (P2; Figs. 3 and 4, middle column), the 0-800 ms time  
404 windows displayed bilateral beta ERD in the fusiform gyri with leftward dominance, along  
405 with left-sided beta ERD in the lateral occipito-temporal cortex and in the IFG. In the 800-  
406 3000 ms time windows, broadband ERD were located in the lateral left temporal cortex  
407 (alpha, beta and low-gamma) and in left IFG and rolandic opercular regions (theta, alpha  
408 and beta; 1200-3000 ms time-windows), as well as the left posterior cingulate cortex  
409 (PCC; high-beta and low-gamma; 1200-1600 ms time-window; not visible on the  
410 projections). These ERD led to left-dominant LI for each time-window and frequency  
411 range.

412           The third part (P3; Figs. 3 and 4, right column) presented stronger and more  
413 extended ERD located in bilateral temporo-occipito-parietal areas, including more  
414 anterior aspects of the lateral temporal cortices. They occurred mostly in the 0-800 ms  
415 time windows and involved theta, alpha, beta and gamma frequency bands. In the 400-  
416 800 ms time window, beta-band ERD also emerged in the left posterior cingulate cortex  
417 (PCC) and precuneus, middle occipital gyri and angular gyri bilaterally and in the superior  
418 part of the cerebellum. Moreover, theta and beta ERD were observed in the left IFG and  
419 rolandic operculum from 0 to approximately 2000 ms post-stimulus. Finally, a late (1600-  
420 2000 ms) and small gamma-band ERD was also present in the right IFG (not visible on  
421 the figure as it involved only a few brain sources). These ERDs led to left-dominant LI,  
422 except for the 0-800 ms time windows and beta and gamma-bands.

423 Overall, in each sentence part, the alpha and beta frequency bands (Fig. 3, rows  
424 2-4) accounted for the majority of the significant ERD in the wide-band, temporally  
425 averaged maps (Fig. 3, last row).

426

### 427 3.3. Right vs. left comparative spectro-temporal neural dynamics in the ventral language 428 stream during SC

429 Among the three pairwise comparisons between the right and left components of  
430 the ventral language stream, the only significant ( $p=.0495$ , with small-volume FWE and  
431 Bonferroni correction) difference emerged in P2 in the alpha/low-beta bands (11-14 Hz)  
432 in a cluster centered on 900-1050 ms. This difference originated from clearly more ERD  
433 on the left, with a sustained 8-30 Hz ERD after the initial dominant ERD centered on  
434 400 ms, contrasting with a more subtle 8-20 Hz ERS trail on the right.

435 Infra-threshold analysis did not demonstrate prolonged ERD on the right side  
436 compared to the left in P1 or P3. Indeed, in P1, the time-frequency dynamics was  
437 similar to the global spectro-temporal dynamics of SC on both sides. In P3, the ERD  
438 centered on 400 ms was actually slightly narrower.

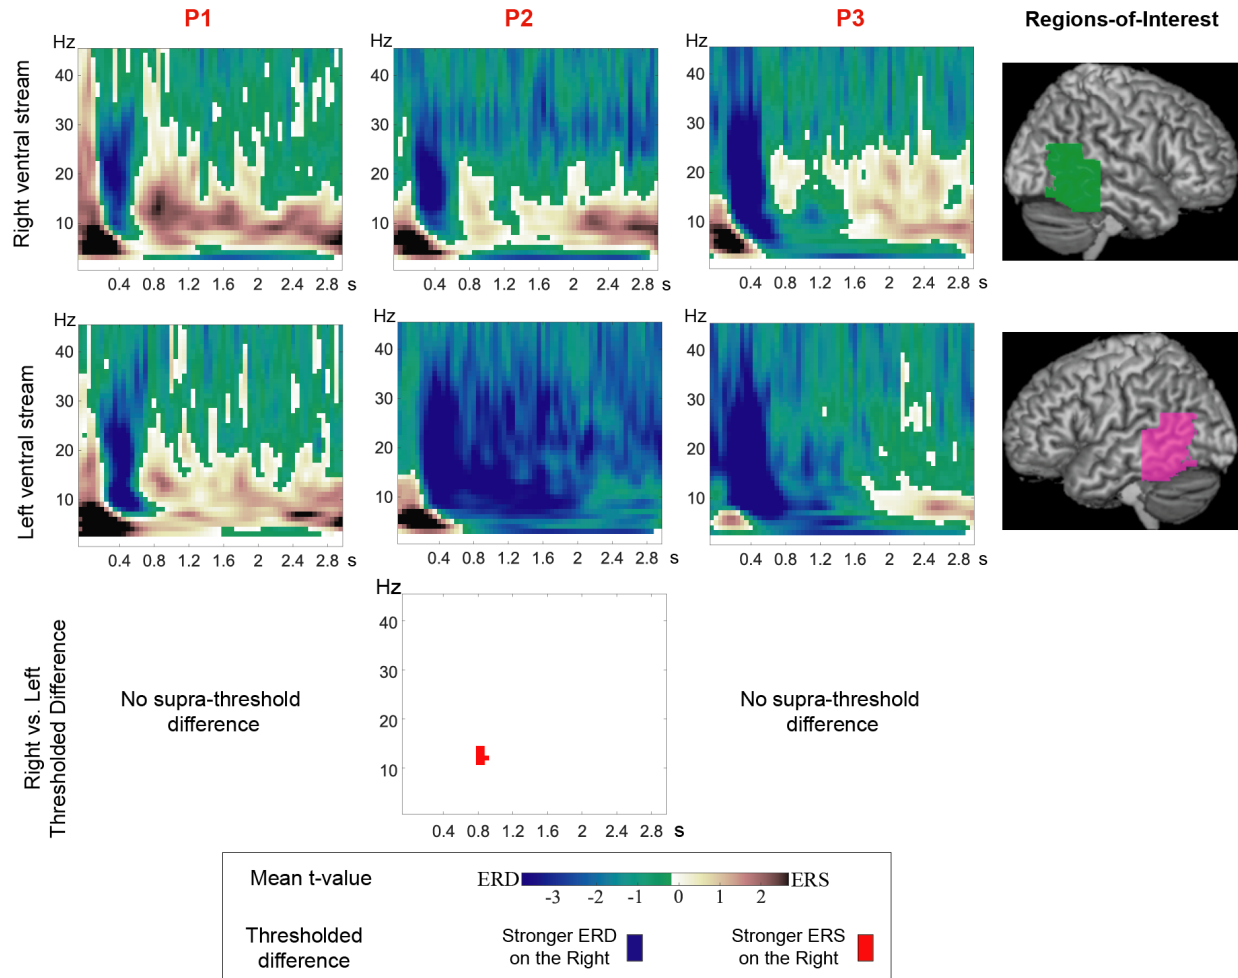

439

440 **Figure 5: Right vs. left comparative spectro-temporal neural dynamics in the**  
 441 **ventral language stream during SC.** The first (P1: noun and determiner), second (P2,  
 442 part of predicate) and third (P3, to be completed) parts are depicted in the  
 443 corresponding three columns. Time-frequency group-level  $t$ -statistics (without statistical  
 444 masking) averaged within a ROI (**Region-of-Interest; rightmost column**) are shown in  
 445 a pink to dark red scale grading the positive (ERS) and green to dark blue scale grading  
 446 the negative (ERD)  $t$ -values. **Top.** In the right component of the language ventral stream  
 447 (green ROI). **Middle.** In its left component (pink ROI). **Bottom.** Pairwise right vs. left  
 448 comparison pairs ( $p < .05$  with small-volume FWE correction and additional Bonferroni  
 449 correction for the 3 comparisons considered), coded in red for a stronger ERD or  
 450 conversely, in blue for a stronger ERD on the right.

## 451 **4. Discussion**

452

453 This MEG study demonstrates that SC elicits three successive significant neural  
454 response patterns characterized by distinct spectro-temporal signatures and anatomical  
455 locations for each sentence part: (i) an early (<300 ms post-stimulus) bilateral 4-10 Hz  
456 ERS in occipital cortices that is most conspicuous in P1; (ii) an 8-30 Hz ERD at about 400  
457 ms post-stimulus involving the ventral language stream of both hemispheres as well as  
458 posterior nodes of the default mode network (DMN); and (iii) a late (> 800 ms post-  
459 stimulus) 8-30 Hz ERD involving the left dorsal language stream observed in P2 and P3.  
460 Furthermore, the left ventral language stream displayed prolonged 8-30 Hz ERD from 800  
461 ms post-stimulus during P2 compared to its right homolog which showed an 8-20 Hz ERS  
462 from 800 ms post-stimulus.

463

### 464 4.1 First neural response pattern of SC: low-level visual processing

465 The first neural response associated with SC was characterized by a 4-10 Hz ERS  
466 which was localized in the bilateral primary visual cortices and the right superior occipital  
467 gyrus during P1. A similar response was also observed in P2 and P3, but it did not reach  
468 statistical significance. This response is attributed to the visual processing of written  
469 stimuli given its rapid post-stimulus (0-300 ms) occurrence. This first response is in  
470 agreement with the timing and topography of previously reported MEG responses at play  
471 during reading and that are related to non-specific, pre-lexico-semantic visual features  
472 (Pammer et al., 2004; Tarkiainen et al., 1999; for a review, see Salmelin 2007).

473

### 474 4.2. Second neural response pattern of SC: bihemispheric semantic processing

475 The second response was associated with an ERD in the alpha-beta (8-30 Hz)  
476 frequency range centered at about 400 ms post-stimulus (starting at about 200-300 ms  
477 post-stimulus and lasting 300 to 400 ms) in each part of the sentence, but most prominent  
478 during P2 and P3. It was located in the bilateral posterior inferior/middle temporal gyri,  
479 and also in the left IFG during P2.

480 The timing of this response probably relates to the previously described N400m  
481 evoked response associated with lexico-semantic processing (Halgren et al., 2002;

482 Salmelin, 2007). As in the present study, this response has also been shown to involve  
483 frontal brain areas, co-occurring as early as from 200-250 ms (Halgren et al., 2002;  
484 Helenius, 1998; Pammer et al., 2004; Vartiainen et al., 2011). In accordance with previous  
485 studies (Halgren et al., 2002; Hultén et al., 2019; Pammer et al., 2004), the observed  
486 bilateral occipito-temporal ERD and the co-modulations occurring around 400 ms in the  
487 left inferior frontal (in P1,2,3) and the temporal (left in P2 and bilateral in P3) areas are  
488 jointly attributed to the same N400m response of SC, where phono-lexico-semantic  
489 integration concomitantly occurs with the processing of visual words to conduct the  
490 reading process effectively.

491 The bi-hemispheric N400m ERD in the posterior temporal lobes consistently  
492 colocalized with the ventral stream of language (Hickok & Poeppel, 2007). It has been  
493 suggested that word- and sentence-level comprehension rely on different processing  
494 strategies in both hemispheres (Federmeier et al., 2008) and that specific right temporal  
495 contribution is involved in sentence-level processing (Vigneau et al., 2010). However, at  
496 this stage we did not find significant interhemispheric asymmetries in the spectral  
497 signature that could suggest a differential contribution.

498 In addition to the involvement of the ventral language stream, posterior parasagittal  
499 and lateral parietal cortices also presented ERD in the beta band at about 400 ms post-  
500 stimulus, which is consistent with the concept of a distributed semantic network (Binder,  
501 2015; Graves, 2010; Paunov et al., 2019; Seghier & Price, 2012; Whitney et al., 2009),  
502 involved in the semantic processes of sentences (as reviewed by Weiss & Mueller, 2012).  
503 Contrastingly, in fMRI, Graves (2010) and Whitney et al. (2009) relied on semantic tasks  
504 being contrasted with other high-level language tasks (e.g., familiar highly meaningful  
505 phrases vs. unfamiliar phrases with minimal meaning) to demonstrate a relative increase  
506 in fMRI signal in the regions classically attributed to the default mode network (for a  
507 review, see e.g., Raichle, 2015). These nodes are typically anticorrelated with the task at  
508 hand and Seghier & Price (2012) found that their degree of deactivation was dependent  
509 on the semantic nature of the task. We here find a common beta-band ERD signature  
510 throughout the whole extended semantic network, in distinction with the known  
511 heterogeneity of its fMRI counterpart (activations and deactivations). The engagement of

512 the posterior DMN may facilitate the retrieval and integration of relevant informational and  
513 contextual content (Buckner et al., 2008) in order to select a relevant completion.

514 Of note, the beta-band ERD in the anterior lobe of the right cerebellum in P3 could  
515 support the potential semantic role of the cerebellum in semantic language processing.  
516 Right cerebellar contribution to the language function has been largely documented (for  
517 reviews, see, e.g., Mariën et al., 2013; Price, 2012) and even used as a crossed cerebro-  
518 cerebellar lateralization aid in a presurgical functional language mapping perspective  
519 (Méndez Orellana et al., 2015). However, given the many language subprocesses it has  
520 been associated with (Mariën et al., 2013), the ERD in the right cerebellum might reflect  
521 its role as a general contributor/modulator of higher cognitive processes rather than  
522 representing another specific node of the distributed semantic network.

523

#### 524 4.3. Third neural response pattern of SC: left-sided dorsal stream integration

525 The third and last neural response pattern was characterized by an alpha-beta  
526 ERD in P2 and P3, taking place from >800 ms post-stimulus. Contrary to previous  
527 responses, this ERD, most clearly demonstrated in P2, presented a clear leftward  
528 dominance (LI ERD = .54 to 1) and mainly involved the left fronto-temporal regions. These  
529 areas (IFG, superior temporal gyrus) are topographically consistent with the key regions  
530 of the classical Broca–Wernicke–Lichtheim–Geschwind model (Tremblay & Dick, 2016)  
531 and of the more recently proposed MUC (Memory, Unification, Control) model (Hagoort,  
532 2013). Information processed in the previous N400 step might be integrated during these  
533 long-lasting ERD within the left hemisphere, dominant for language processing (Tzourio-  
534 Mazoyer et al., 2017), to be further semantically and syntactically unified, and to allow  
535 control (Hagoort, 2013) and selection of the required words to properly complete the  
536 sentence. They are also anatomically in line with the left-dominant dorsal stream of the  
537 dual stream model (Hickok & Poeppel, 2007), including the revisited, speech production  
538 Wernicke’s area (Binder, 2015). They might therefore also reflect some level of production  
539 and phonological processes (Vigneau et al., 2006), such as verbal working memory to  
540 maintain the sentence content (Meltzer et al., 2017).

541 In the ventral stream, no whole-brain suprathreshold modulation was  
542 demonstrated at this stage. However, focused ROI analyses showed a sustained alpha-



543 beta ERD on the left, contrasting with moderate ERS in those frequency bands on the  
544 right in P2 and P3 (the right vs. left difference reaching significance only in P2).  
545 Considering that alpha-beta bands ERS may be considered as an electrophysiological  
546 correlate of a deactivated/inhibited cortical area (for reviews, see, e.g., Klimesch et al.,  
547 2007; Pfurtscheller, 2001), we here suggest a left-to-right interhemispheric inhibition  
548 (Tzourio-Mazoyer et al., 2017) where the left hemisphere would recover its dominance  
549 for efficient left intra-hemispheric integration (Gotts et al., 2013), through a left-to-right  
550 “top-down” inhibition by means of alpha-beta modulations (Fries, 2015). Indeed, the  
551 genetic, developmental, structural and functional factors (for reviews, see e.g., Stephan  
552 et al., 2007; Tzourio-Mazoyer et al., 2017) leading to left hemisphere specialization for  
553 language, might position this hemisphere as the actual higher order language hemisphere  
554 for subsequent SC process, endowed with the control component of the MUC model  
555 (Hagoort, 2013). We therefore did not find signs of sustained engagement of the right  
556 hemisphere that could indicate retention of multiple meanings for prolonged periods of  
557 time (Kircher et al., 2001) or integration of information over longer timescales as in  
558 auditory speech processing (Hickok & Poeppel, 2007).

559

#### 560 4.4. Neural processing in the ventral and dorsal streams of the language network during 561 SC is dominated by transient alpha-beta frequency band power decrease

562 Spectral specialization in language processing has been suggested for different  
563 frequency bands due to selectivity to certain linguistic manipulations (for a review, see,  
564 e.g., Meyer, 2017). It can also be suspected given the observation of a spatio-spectral  
565 pattern in the language network during task (Goto et al., 2011) or at rest (Coolen et al.,  
566 2020), whereby lower frequency bands (theta, alpha) tend to localize ventrally and  
567 posteriorly while higher frequency bands (beta, gamma) are more dorsal and anterior, in  
568 their modulations or connectivity.

569 However, in this study, alpha and beta ERD represented the main neural activity  
570 modulations observed within the whole language network. The main alpha-beta-band  
571 spectrum in language-related neural processes found here is in agreement with the  
572 prominence of the ERD in those two frequency bands reported in previous MEG language  
573 studies (Goto et al., 2011; Lam et al., 2016; Piai et al., 2015), and with the concept of a

574 broadband alpha-beta (8-30 Hz) ERD in sentence processing (Kielar et al., 2015; Meltzer  
575 et al., 2017; Meltzer & Braun, 2011). The alpha (e.g., Obleser & Weisz, 2012; Wang et  
576 al., 2018) and beta (e.g., Piai et al., 2015; Weiss & Mueller, 2012) frequency bands have  
577 been shown to be involved in language processes in various experimental designs and  
578 to serve as the main channels for interactions within the language network (Schoffelen et  
579 al., 2017). Beyond information transfer (Buzsáki & Draguhn, 2004), the observed  
580 coordinated alpha-beta ERD constituting the response patterns in the extended semantic  
581 network and in the dorsal stream of language might also reflect the formation of specific  
582 dynamic workspaces (Lopes da Silva, 2013), for efficient and sustained language  
583 processing. In addition, a spatial correlation was previously shown between task-related  
584 ERD in alpha-beta bands and the fMRI task-related changes (Hall et al., 2014; Mukamel,  
585 2005), particularly in language tasks (Singh et al., 2002).

#### 586 4.5. Limitations

587           In contrast with some previous sentence-level paradigms (e.g., Kielar et al., 2015;  
588 Meltzer et al., 2017), this study did not use specific linguistic manipulations. In particular,  
589 the lack of controlled semantic modulations (e.g., theory-of-mind, semantic complexity)  
590 did not allow for the refinement of the relative contribution of the constituent parts of the  
591 observed extended semantic network, especially that of the posterior nodes of the DMN.  
592 We also did not use standardized sentences (e.g., Kircher et al., 2001; Wilson et al., 2017)  
593 nor recorded the completions given by the subjects. Moreover, our design (3 second-long  
594 variable length stimuli) did not allow for a fine-grained temporal analysis (e.g., Halgren et  
595 al., 2002; Hultén et al., 2019). We instead provided a continuous, detailed neuromagnetic  
596 overview of the neural dynamics occurring during a classic nonstandardized SC  
597 paradigm.

598           Finally, the rather limited population, the prior-free whole-brain analysis and the  
599 stringent maximum statistics that we used might have impeded statistical power. For  
600 instance, the immediate post-stimulus lower-level visual processing step (described in  
601 4.1) reached statistical significance only in P1. In the other two parts of the sentence (P2,  
602 P3), this approach might be solely picking up the maximum difference from baseline  
603 driven by the language-related ERD. This probably includes the temporal modulations  
604 around 400 ms associated with the increasing semantic load and N400m effect (Halgren  
605 et al., 2002), that remained infra-threshold in P1. Similarly, the relative lack of significant  
606 deviations from baseline observed in the theta and gamma bands could be partly due to  
607 the biased sensitivity of our statistical approach to the stronger and most consistent ERD  
608 in alpha and beta bands. Conversely, the spectro-temporal modulations we reported are  
609 highly likely to represent true neural responses. The use of stringent maximum statistics  
610 also ensures the robustness of the observed neural activity modulations.

## 611           **5. Conclusions**

612

613           This study elucidates the neural dynamics that accompany the SC process,  
614 consisting of three successive neural response patterns associated with distinct spatial  
615 and spectro-temporal characteristics: an early low-level visual response; an intermediate  
616 bihemispheric semantic processing within an extended semantic network; a late left-  
617 hemisphere dorsal language stream integration.

618           We brought critical insight into the differential contribution of the ventral language  
619 stream, where the right-sided contribution is more transient and associated with some  
620 signs of subsequent inhibition. Furthermore, we demonstrated a common fingerprint  
621 throughout an extended semantic network. This shared signature is in contradistinction  
622 with its known heterogeneous hemodynamics (i.e., task-correlation of fMRI signal in  
623 temporal areas versus anticorrelation in the DMN). Therefore, this study may encourage  
624 more MEG research in sentence-level paradigms and their engagement of the extended  
625 semantic network. MEG-fMRI correspondence studies are also needed to elucidate the  
626 apparent heterogeneity of the neurovascular coupling within that network.

627           This adaptation of the fMRI SC paradigm to MEG paves the way for neuromagnetic  
628 preoperative language mapping in neurosurgical patients, free of neurovascular coupling  
629 issues (see e.g., Pak et al., 2017). Thanks to the dynamic dimension brought by MEG in  
630 SC, this may help in the identification of regions that need to be preserved among all  
631 activated regions disclosed by the static mapping fMRI provides. It also opens new  
632 perspectives in understanding the physiopathology of language alterations in various  
633 brain disorders. For instance, sentence completion tests have been administered to  
634 evaluate cognition in neurodegenerative diseases, such as Alzheimer's disease (Kim &  
635 Thompson, 2004; Martyr et al., 2019) Parkinson's disease (Martyr et al., 2019; Siquier &  
636 Andrés, 2021) and amyotrophic lateral sclerosis (Abrahams et al., 2005). MEG should  
637 bring novel insights in the spectro-temporal correlates of previously reported  
638 abnormalities.

639 **CRedit author statement**

640

641 **T. Coolen:** Conceptualization, Software, Formal Analysis, Investigation, Writing -  
642 Original Draft, Visualization. **A.M. Dumitrescu:** Conceptualization, Formal Analysis,  
643 Investigation, Writing - Review and Editing, Visualization. **V. Wens:** Methodology,  
644 Software, Formal Analysis, Resources, Writing - Review and Editing. **M. Bourguignon:**  
645 Software, Review and Editing. **G.L. Gómez:** Methodology, Software, Resources. **A.**  
646 **Rovai:** Software, Resources. **N. Sadeghi:** Writing - Review and Editing, Supervision. **C.**  
647 **Urbain:** Writing - Review and Editing, Supervision. **S. Goldman:** Writing - Review and  
648 Editing, Supervision, Project Administration, Funding Acquisition. **X. De Tiège:**  
649 Conceptualization, Writing - Review and Editing, Project Administration, Funding  
650 Acquisition.

651

652 **Acknowledgements**

653

654 Tim Coolen (MD, PhD student) is Clinical Master Specialist Applicant to a PhD at  
655 the Fonds de la Recherche Scientifique (FRS-FNRS, Brussels, Belgium). Alexandru  
656 Dumitrescu is supported by the Fonds Erasme (Research Convention “Les Voies du  
657 Savoir”, Brussels, Belgium). Gustavo Lucena Gómez was supported by the Excellence  
658 of Science “MEMODYN” of the Fonds de la Recherche Scientifique (FRS-FNRS,  
659 Brussels, Belgium). Xavier De Tiège is a Postdoctorate Clinical Master Specialist at the  
660 FRS-FNRS (Brussels, Belgium). This study and the MEG project at the CUB Hôpital  
661 Erasme are financially supported by the Fonds Erasme (Research Convention “Les Voies  
662 du Savoir”, Brussels, Belgium). Funding sources had no involvement in the present study.  
663 Declarations of interest: none.

664

665 We extend our gratitude to Thomas Amighi (Master Student at the Faculty of  
666 Psychology, Université libre de Bruxelles) for collecting the behavioral data presented in  
667 the Supplementary Materials.

## 668 References

669

- 670 Abrahams, S., Leigh, P. N., & Goldstein, L. H. (2005). Cognitive change in ALS: A prospective study.  
671 *Neurology*, *64*(7), 1222–1226. <https://doi.org/10.1212/01.WNL.0000156519.41681.27>
- 672 Amaro, E., & Barker, G. J. (2006). Study design in fMRI: Basic principles. *Brain and Cognition*, *60*(3),  
673 220–232. <https://doi.org/10.1016/j.bandc.2005.11.009>
- 674 Ashtari, M., Perrine, K., Elbaz, R., Syed, U., Thaden, E., Mcllree, C., Dolgoff-Kaspar, R., Clarke, T.,  
675 Diamond, A., & Ettinger, A. (2005). Mapping the functional anatomy of sentence comprehension  
676 and application to presurgical evaluation of patients with brain tumor. *AJNR. American Journal of*  
677 *Neuroradiology*, *26*(6), 1461–1468.
- 678 Barnett, A., Marty-Dugas, J., & McAndrews, M. P. (2014). Advantages of sentence-level fMRI language  
679 tasks in presurgical language mapping for temporal lobe epilepsy. *Epilepsy & Behavior*, *32*, 114–  
680 120. <https://doi.org/10.1016/j.yebeh.2014.01.010>
- 681 Binder, J. R. (2015). The Wernicke area: Modern evidence and a reinterpretation. *Neurology*, *85*(24),  
682 2170–2175. <https://doi.org/10.1212/WNL.0000000000002219>
- 683 Black, D. F., Vachha, B., Mian, A., Faro, S. H., Maheshwari, M., Sair, H. I., Petrella, J. R., Pillai, J. J., &  
684 Welker, K. (2017). American society of functional neuroradiology-recommended fMRI paradigm  
685 algorithms for presurgical language assessment. *American Journal of Neuroradiology*, *38*(10),  
686 E65–E73. <https://doi.org/10.3174/ajnr.A5345>
- 687 Buckner, R. L., Andrews-Hanna, J. R., & Schacter, D. L. (2008). The Brain's Default Network: Anatomy,  
688 Function, and Relevance to Disease. *Annals of the New York Academy of Sciences*, *1124*(1), 1–  
689 38. <https://doi.org/10.1196/annals.1440.011>
- 690 Buzsáki, G., & Draguhn, A. (2004). Neuronal oscillations in cortical networks. *Science*, *304*(5679), 1926–  
691 1929. <https://doi.org/10.1126/science.1099745>
- 692 Coolen, T., Wens, V., Vander Ghinst, M., Mary, A., Bourguignon, M., Naeije, G., Peigneux, P., Sadeghi,  
693 N., Goldman, S., & De Tiège, X. (2020). Frequency-Dependent Intrinsic Electrophysiological  
694 Functional Architecture of the Human Verbal Language Network. *Frontiers in Integrative*  
695 *Neuroscience*, *14*, 27. <https://doi.org/10.3389/fnint.2020.00027>
- 696 Dale, A. M., & Sereno, M. I. (1993). Improved Localizadon of Cortical Activity by Combining EEG and  
697 MEG with MRI Cortical Surface Reconstruction: A Linear Approach. *Journal of Cognitive*  
698 *Neuroscience*, *5*(2), 162–176. <https://doi.org/10.1162/jocn.1993.5.2.162>
- 699 De Tiège, X., de Beeck, M. O., Funke, M., Legros, B., Parkkonen, L., Goldman, S., & Van Bogaert, P.  
700 (2008). Recording epileptic activity with MEG in a light-weight magnetic shield. *Epilepsy*  
701 *Research*, *82*(2–3), 227–231. <https://doi.org/10.1016/J.EPLEPSYRES.2008.08.011>
- 702 Federmeier, K. D., Wlotko, E. W., & Meyer, A. M. (2008). What's 'Right' in Language Comprehension:  
703 Event-Related Potentials Reveal Right Hemisphere Language Capabilities. *Language and*  
704 *Linguistics Compass*, *2*(1), 1–17. <https://doi.org/10.1111/j.1749-818X.2007.00042.x>
- 705 Fischl, B. (2012). FreeSurfer. *Neuroimage*, *62*(2), 774–781.  
706 <https://doi.org/10.1016/j.neuroimage.2012.01.021.FreeSurfer>
- 707 Fries, P. (2015). Rhythms for Cognition: Communication through Coherence. *Neuron*, *88*(1), 220–235.  
708 <https://doi.org/10.1016/j.neuron.2015.09.034>
- 709 Goto, T., Hirata, M., Umekawa, Y., Yanagisawa, T., Shayne, M., Saitoh, Y., Kishima, H., Yorifuji, S., &  
710 Yoshimine, T. (2011). Frequency-dependent spatiotemporal distribution of cerebral oscillatory  
711 changes during silent reading: A magnetoencephalographic group analysis. *NeuroImage*, *54*(1),  
712 560–567. <https://doi.org/10.1016/j.neuroimage.2010.08.023>
- 713 Gotts, S. J., Jo, H. J., Wallace, G. L., Saad, Z. S., Cox, R. W., & Martin, A. (2013). Two distinct forms of  
714 functional lateralization in the human brain. *Proceedings of the National Academy of Sciences*,  
715 *110*(36), E3435–E3444. <https://doi.org/10.1073/pnas.1302581110>

- 716 Gramfort, A., Luessi, M., Larson, E., Engemann, D., Strohmeier, D., Brodbeck, C., Parkkonen, L., &  
717 Hämäläinen, M. (2014). MNE software for processing MEG and EEG data. *Neuroimage*, 86, 446–  
718 460. <https://doi.org/10.1016/j.neuroimage.2013.10.027>
- 719 Graves, W. W. (2010). *Neural correlates of implicit and explicit combinatorial semantic processing*. 9.  
720 Gross, J., Baillet, S., Barnes, G. R., Henson, R. N., Hillebrand, A., Jensen, O., Jerbi, K., Litvak, V.,  
721 Maess, B., Oostenveld, R., Parkkonen, L., Taylor, J. R., van Wassenhove, V., Wibral, M., &  
722 Schoffelen, J. M. (2013). Good practice for conducting and reporting MEG research. *NeuroImage*,  
723 65, 349–363. <https://doi.org/10.1016/j.neuroimage.2012.10.001>
- 724 Hagoort, P. (2013). MUC (memory, unification, control) and beyond. *Frontiers in Psychology*, 4(JUL), 1–  
725 13. <https://doi.org/10.3389/fpsyg.2013.00416>
- 726 Halgren, E., Dhond, R. P., Christensen, N., Van Petten, C., Marinkovic, K., Lewine, J. D., & Dale, A. M.  
727 (2002). N400-like magnetoencephalography responses modulated by semantic context, word  
728 frequency, and lexical class in sentences. *NeuroImage*, 17(3), 1101–1116.  
729 <https://doi.org/10.1006/nimg.2002.1268>
- 730 Hall, E. L., Robson, S. E., Morris, P. G., & Brookes, M. J. (2014). The relationship between MEG and  
731 fMRI. *NeuroImage*. <https://doi.org/10.1016/j.neuroimage.2013.11.005>
- 732 Helenius, P. (1998). Distinct time courses of word and context comprehension in the left temporal cortex.  
733 *Brain*, 121(6), 1133–1142. <https://doi.org/10.1093/brain/121.6.1133>
- 734 Hickok, G., & Poeppel, D. (2007). The cortical organization of speech processing. *Nature Reviews*.  
735 *Neuroscience*, 8(5), 393–402. <https://doi.org/10.1038/nrn2113>
- 736 Hultén, A., Schoffelen, J.-M., Uddén, J., Lam, N. H. L., & Hagoort, P. (2019). How the brain makes sense  
737 beyond the processing of single words – An MEG study. *NeuroImage*, 186, 586–594.  
738 <https://doi.org/10.1016/j.neuroimage.2018.11.035>
- 739 Hyvärinen, A., & Oja, E. (2000). Independent Component Analysis: Algorithms and Applications. In  
740 *Neural Networks* (Vol. 13, Issue 5, pp. 411–430).
- 741 Kielar, A., Panamsky, L., Links, K. A., & Meltzer, J. A. (2015). Localization of electrophysiological  
742 responses to semantic and syntactic anomalies in language comprehension with MEG.  
743 *NeuroImage*, 105, 507–524. <https://doi.org/10.1016/j.neuroimage.2014.11.016>
- 744 Kim, M., & Thompson, C. K. (2004). Verb deficits in Alzheimer's disease and agrammatism: Implications  
745 for lexical organization. *Brain and Language*, 88(1), 1–20. [https://doi.org/10.1016/S0093-](https://doi.org/10.1016/S0093-934X(03)00147-0)  
746 [934X\(03\)00147-0](https://doi.org/10.1016/S0093-934X(03)00147-0)
- 747 Kircher, T. T. J., Brammer, M., Tous Andreu, N., Williams, S. C. R., & McGuire, P. K. (2001). Engagement  
748 of right temporal cortex during processing of linguistic context. *Neuropsychologia*, 39(8), 798–  
749 809. [https://doi.org/10.1016/S0028-3932\(01\)00014-8](https://doi.org/10.1016/S0028-3932(01)00014-8)
- 750 Klimesch, W., Sauseng, P., & Hanslmayr, S. (2007). EEG alpha oscillations: The inhibition–timing  
751 hypothesis. *Brain Research Reviews*, 53(1), 63–88.  
752 <https://doi.org/10.1016/j.brainresrev.2006.06.003>
- 753 Lam, N. H. L., Schoffelen, J.-M., Uddén, J., Hultén, A., & Hagoort, P. (2016). Neural activity during  
754 sentence processing as reflected in theta, alpha, beta, and gamma oscillations. *NeuroImage*,  
755 142, 43–54. <https://doi.org/10.1016/j.neuroimage.2016.03.007>
- 756 Lopes da Silva, F. (2013). EEG and MEG: Relevance to neuroscience. *Neuron*, 80(5), 1112–1128.  
757 <https://doi.org/10.1016/j.neuron.2013.10.017>
- 758 Mariën, P., Ackermann, H., Adamaszek, M., Barwood, C. H. S., Beaton, A., Desmond, J., De Witte, E.,  
759 Fawcett, A. J., Hertrich, I., Küper, M., Leggio, M., Marvel, C., Molinari, M., Murdoch, B. E.,  
760 Nicolson, R. I., Schmahmann, J. D., Stoodley, C. J., Thürling, M., Timmann, D., ... Ziegler, W.  
761 (2013). Consensus Paper: Language and the Cerebellum: an Ongoing Enigma. *The Cerebellum*.  
762 <https://doi.org/10.1007/s12311-013-0540-5>
- 763 Martyr, A., Boycheva, E., & Kudlicka, A. (2019). Assessing inhibitory control in early-stage Alzheimer's  
764 and Parkinson's disease using the Hayling Sentence Completion Test. *Journal of*

- 765           *Neuropsychology*, 13(1), 67–81. <https://doi.org/10.1111/jnp.12129>
- 766 Meltzer, J. A., & Braun, A. R. (2011). An EEG-MEG dissociation between online syntactic comprehension  
767 and post hoc reanalysis. *Frontiers in Human Neuroscience*, 5(FEBRUARY), 1–15.  
768 <https://doi.org/10.3389/fnhum.2011.00010>
- 769 Meltzer, J. A., Kiehl, A., Panamsky, L., Links, K. A., Deschamps, T., & Leigh, R. C. (2017).  
770 Electrophysiological signatures of phonological and semantic maintenance in sentence repetition.  
771 *NeuroImage*, 156, 302–314. <https://doi.org/10.1016/j.neuroimage.2017.05.030>
- 772 Méndez Orellana, C., Visch-Brink, E., Vernooij, M., Kalløe, S., Satoer, D., Vincent, A., Van Der Lugt, A., &  
773 Smits, M. (2015). Crossed Cerebrocerebellar Language Lateralization: An Additional Diagnostic  
774 Feature for Assessing Atypical Language Representation in Presurgical Functional MR Imaging.  
775 *American Journal of Neuroradiology*, 36(3), 518–524. <https://doi.org/10.3174/ajnr.A4147>
- 776 Meyer, L. (2017). The neural oscillations of speech processing and language comprehension: State of the  
777 art and emerging mechanisms. *European Journal of Neuroscience*, 1–13.  
778 <https://doi.org/10.1111/ejn.13748>
- 779 Mukamel, R. (2005). Coupling Between Neuronal Firing, Field Potentials, and fMRI in Human Auditory  
780 Cortex. *Science*, 309(5736), 951–954. <https://doi.org/10.1126/science.1110913>
- 781 Obleser, J., & Weisz, N. (2012). Suppressed alpha oscillations predict intelligibility of speech and its  
782 acoustic details. *Cerebral Cortex*, 22(11), 2466–2477. <https://doi.org/10.1093/cercor/bhr325>
- 783 Oldfield, R. C. (1971). The assessment and analysis of handedness: The Edinburgh inventory.  
784 *Neuropsychologia*, 9(1), 97–113. [https://doi.org/10.1016/0028-3932\(71\)90067-4](https://doi.org/10.1016/0028-3932(71)90067-4)
- 785 Oostenveld, R., Fries, P., Maris, E., & Schoffelen, J. M. (2011). FieldTrip: Open source software for  
786 advanced analysis of MEG, EEG, and invasive electrophysiological data. *Computational*  
787 *Intelligence and Neuroscience*, 2011. <https://doi.org/10.1155/2011/156869>
- 788 Pak, R. W., Hadjiabadi, D. H., Senarathna, J., Agarwal, S., Thakor, N. V., Pillai, J. J., & Pathak, A. P.  
789 (2017). Implications of neurovascular uncoupling in functional magnetic resonance imaging  
790 (fMRI) of brain tumors. *Journal of Cerebral Blood Flow & Metabolism*, 37(11), 3475–3487.  
791 <https://doi.org/10.1177/0271678X17707398>
- 792 Pammer, K., Hansen, P. C., Kringelbach, M. L., Holliday, I., Barnes, G., Hillebrand, A., Singh, K. D., &  
793 Cornelissen, P. L. (2004). Visual word recognition: The first half second. *NeuroImage*, 22(4),  
794 1819–1825. <https://doi.org/10.1016/j.neuroimage.2004.05.004>
- 795 Pascual-Marqui, R. D. (2002). Standardized low resolution brain electromagnetic. *Clinical Pharmacology*,  
796 16.
- 797 Paunov, A. M., Blank, I. A., & Fedorenko, E. (2019). Functionally distinct language and Theory of Mind  
798 networks are synchronized at rest and during language comprehension. *Journal of*  
799 *Neurophysiology*, 121(4), 1244–1265. <https://doi.org/10.1152/jn.00619.2018>
- 800 Petrella, J. R., Shah, L. M., Harris, K. M., Friedman, A. H., George, T. M., Sampson, J. H., Pekala, J. S.,  
801 & Voyvodic, J. T. (2006). Preoperative functional MR imaging localization of language and motor  
802 areas: Effect on therapeutic decision making in patients with potentially resectable brain tumors.  
803 *Radiology*, 240(3), 793–802. <https://doi.org/10.1148/radiol.2403051153>
- 804 Pfurtscheller, G. (2001). Functional brain imaging based on ERD/ERS. *Vision Research*, 41(10–11),  
805 1257–1260. [https://doi.org/10.1016/S0042-6989\(00\)00235-2](https://doi.org/10.1016/S0042-6989(00)00235-2)
- 806 Piai, V., Roelofs, A., Rommers, J., & Maris, E. (2015). Beta oscillations reflect memory and motor aspects  
807 of spoken word production. *Human Brain Mapping*, 36(7), 2767–2780.  
808 <https://doi.org/10.1002/hbm.22806>
- 809 Price, C. J. (2012). A review and synthesis of the first 20 years of PET and fMRI studies of heard speech,  
810 spoken language and reading. *NeuroImage*, 62(2), 816–847.  
811 <https://doi.org/10.1016/j.neuroimage.2012.04.062>
- 812 Raichle, M. E. (2015). The Brain's Default Mode Network. *Annual Review of Neuroscience*, 38(1), 433–  
813 447. <https://doi.org/10.1146/annurev-neuro-071013-014030>



- 814 Rorden, C., & Brett, M. (2000). Stereotaxic Display of Brain Lesions. *Behavioural Neurology*, *12*(4), 191–  
815 200. <https://doi.org/10.1155/2000/421719>
- 816 Salek, K. E., Hassan, I. S., Kotrotsou, A., Abrol, S., Faro, S. H., Mohamed, F. B., Zinn, P. O., Wei, W., Li,  
817 N., Kumar, A. J., Weinberg, J. S., Wefel, J. S., Kesler, S. R., Liu, H. L. A., Hou, P., Stafford, R. J.,  
818 Prabhu, S., Sawaya, R., & Colen, R. R. (2017). Silent Sentence Completion Shows Superiority  
819 Localizing Wernicke's Area and Activation Patterns of Distinct Language Paradigms Correlate  
820 with Genomics: Prospective Study. *Scientific Reports*, *7*(1), 1–8. <https://doi.org/10.1038/s41598-017-11192-2>
- 821
- 822 Salmelin, R. (2007). Clinical neurophysiology of language: The MEG approach. *Clinical Neurophysiology*,  
823 *118*(2), 237–254. <https://doi.org/10.1016/j.clinph.2006.07.316>
- 824 Saur, D., Kreher, B. W., Schnell, S., Kümmerer, D., Kellmeyer, P., Vry, M.-S., Umarova, R., Musso, M.,  
825 Glauche, V., Abel, S., Huber, W., Rijntjes, M., Hennig, J., & Weiller, C. (2008). Ventral and dorsal  
826 pathways for language. *Proceedings of the National Academy of Sciences of the United States of*  
827 *America*, *105*(46), 18035–18040. <https://doi.org/10.1073/pnas.0805234105>
- 828 Schoffelen, J.-M., Hultén, A., Lam, N., Marquand, A. F., Uddén, J., & Hagoort, P. (2017). Frequency-  
829 specific directed interactions in the human brain network for language. *Proceedings of the*  
830 *National Academy of Sciences*, *114*(30), 8083–8088. <https://doi.org/10.1073/pnas.1703155114>
- 831 Seghier, M. L., & Price, C. J. (2012). Functional heterogeneity within the default network during semantic  
832 processing and speech production. *Frontiers in Psychology*, *3*(AUG), 1–16.  
833 <https://doi.org/10.3389/fpsyg.2012.00281>
- 834 Singh, K. D., Barnes, G. R., Hillebrand, A., Forde, E. M. E., & Williams, A. L. (2002). Task-related  
835 changes in cortical synchronization are spatially coincident with the hemodynamic response.  
836 *NeuroImage*, *16*(1), 103–114. <https://doi.org/10.1006/nimg.2001.1050>
- 837 Siquier, A., & Andrés, P. (2021). Cognitive and Behavioral Inhibition Deficits in Parkinson's Disease: The  
838 Hayling Test as a Reliable Marker. *Frontiers in Aging Neuroscience*, *12*, 621603.  
839 <https://doi.org/10.3389/fnagi.2020.621603>
- 840 Stephan, K. E., Fink, G. R., & Marshall, J. C. (2007). Mechanisms of hemispheric specialization: Insights  
841 from analyses of connectivity. *Neuropsychologia*, *45*(2), 209–228.  
842 <https://doi.org/10.1016/j.neuropsychologia.2006.07.002>
- 843 Stippich, C., Rapps, N., Dreyhaupt, J., Durst, A., Kress, B., Nennig, E., Tronnier, V. M., & Sartor, K.  
844 (2007). Localizing and lateralizing language in patients with brain tumors: Feasibility of routine  
845 preoperative functional MR imaging in 81 consecutive patients. *Radiology*, *243*(3), 828–836.  
846 <https://doi.org/10.1148/radiol.2433060068>
- 847 Tarkiainen, A., Helenius, P., Hansen, P. C., Cornelissen, P. L., & Salmelin, R. (1999). Dynamics of letter  
848 string perception in the human occipitotemporal cortex. *Brain*, *122*(11), 2119–2132.  
849 <https://doi.org/10.1093/brain/122.11.2119>
- 850 Taulu, S., Simola, J., & Kajola, M. (2005). Applications of the signal space separation method. *IEEE*  
851 *Transactions on Signal Processing*, *53*(9), 3359–3372.
- 852 Tremblay, P., & Dick, A. S. (2016). Broca and Wernicke are dead, or moving past the classic model of  
853 language neurobiology. *Brain and Language*, *162*(December), 60–71.  
854 <https://doi.org/10.1016/j.bandl.2016.08.004>
- 855 Tzourio-Mazoyer, N., Landeau, B., Papathanassiou, D., Crivello, F., Etard, O., Delcroix, N., Mazoyer, B.,  
856 & Joliot, M. (2002). Automated anatomical labeling of activations in SPM using a macroscopic  
857 anatomical parcellation of the MNI MRI single-subject brain. *NeuroImage*, *15*(1), 273–289.  
858 <https://doi.org/10.1006/nimg.2001.0978>
- 859 Tzourio-Mazoyer, N., Perrone-Bertolotti, M., Jobard, G., Mazoyer, B., & Baciou, M. (2017). Multi-factorial  
860 modulation of hemispheric specialization and plasticity for language in healthy and pathological  
861 conditions: A review. *Cortex*, *86*, 314–339. <https://doi.org/10.1016/j.cortex.2016.05.013>
- 862 Vartiainen, J., Liljestro, M., Koskinen, M., Renvall, H., & Salmelin, R. (2011). Functional Magnetic

- 863 Resonance Imaging Blood Oxygenation Level-Dependent Signal and Magnetoencephalography  
864 in Reading. *The Journal of Neuroscience*, 31(3), 1048–1058.  
865 <https://doi.org/10.1523/JNEUROSCI.3113-10.2011>
- 866 Vigarío, R., Sarela, J., Jousmiki, V., Hamalainen, M., & Oja, E. (2000). Independent component approach  
867 to the analysis of EEG and MEG recordings. *IEEE Transactions on Biomedical Engineering*,  
868 47(5), 589–593. <https://doi.org/10.1109/10.841330>
- 869 Vigneau, M., Beaucousin, V., Hervé, P. Y., Duffau, H., Crivello, F., Houdry, O., Mazoyer, B., & Tzourio-  
870 Mazoyer, N. (2006). Meta-analyzing left hemisphere language areas: Phonology, semantics, and  
871 sentence processing. *NeuroImage*. <https://doi.org/10.1016/j.neuroimage.2005.11.002>
- 872 Vigneau, M., Beaucousin, V., Hervé, P. Y., Jobard, G., Petit, L., Crivello, F., Mellet, E., Zago, L., Mazoyer,  
873 B., & Tzourio-Mazoyer, N. (2010). What is right-hemisphere contribution to phonological, lexico-  
874 semantic, and sentence processing? Insights from a meta-analysis. *NeuroImage*, 54(1), 577–593.  
875 <https://doi.org/10.1016/j.neuroimage.2010.07.036>
- 876 Wang, L., Hagoort, P., & Jensen, O. (2018). Language Prediction Is Reflected by Coupling between  
877 Frontal Gamma and Posterior Alpha Oscillations. *Journal of Cognitive Neuroscience*, 30(3), 432–  
878 447.
- 879 Weiss, S., & Mueller, H. M. (2012). “Too many betas do not spoil the broth”: The role of beta brain  
880 oscillations in language processing. *Frontiers in Psychology*, 3(JUN), 1–15.  
881 <https://doi.org/10.3389/fpsyg.2012.00201>
- 882 Wens, V., Marty, B., Mary, A., Bourguignon, M., Op de Beeck, M., Goldman, S., Van Bogaert, P.,  
883 Peigneux, P., & De Tiège, X. (2015). A geometric correction scheme for spatial leakage effects  
884 in MEG/EEG seed-based functional connectivity mapping. *Human Brain Mapping*, 36(11), 4604–  
885 4621. <https://doi.org/10.1002/hbm.22943>
- 886 Whitney, C., Huber, W., Klann, J., Weis, S., Krach, S., & Kircher, T. (2009). Neural correlates of narrative  
887 shifts during auditory story comprehension. *NeuroImage*, 47(1), 360–366.  
888 <https://doi.org/10.1016/j.neuroimage.2009.04.037>
- 889 Wilson, S. M., Bautista, A., Yen, M., Lauderdale, S., & Eriksson, D. K. (2017). Validity and reliability of  
890 four language mapping paradigms. *NeuroImage: Clinical*, 16, 399–408.  
891 <https://doi.org/10.1016/j.nicl.2016.03.015>
- 892 Yarkoni, T., Poldrack, R. A., Nichols, T. E., Van Essen, D. C., & Wager, T. D. (2011). Large-scale  
893 automated synthesis of human functional neuroimaging data. *Nature Methods*.  
894 <https://doi.org/10.1038/nmeth.1635>
- 895 Zacà, D., Jarso, S., & Pillai, J. J. (2013). Role of semantic paradigms for optimization of language  
896 mapping in clinical fMRI studies. *American Journal of Neuroradiology*, 34(10), 1966–1971.  
897 <https://doi.org/10.3174/ajnr.A3628>
- 898 Zaca, D., Nickerson, J. P., Deib, G., & Pillai, J. J. (2012). Effectiveness of four different clinical fMRI  
899 paradigms for preoperative regional determination of language lateralization in patients with brain  
900 tumors. *Neuroradiology*, 54(9), 1015–1025. <https://doi.org/10.1007/s00234-012-1056-2>
